# Supplementary material for: A tetrasulfide bond-bridged mesoporous organosilica-based nanoplatform for triple-enhanced chemodynamic therapy combined with chemotherapy and H2S therapy
Source: Royal Society of Chemistry journal article supplement (doi:10.1039/d3tb02147e), 2023-01-01
Supplement: d3tb02147e1.pdf [file d3tb02147e1.pdf]

**Tetrasulfide bond-bridged mesoporous organosilica-based  
nanoplatfom for triple-enhanced chemodynamic therapy combined  
with chemotherapy and H<sub>2</sub>S therapy**

*Mingzhe Liu*<sup>a</sup>, *Hui Xu*<sup>b</sup>, *FangFang Zhou*<sup>c</sup>, *Xiyu Gong*<sup>c</sup>, *Songwen Tan*<sup>d</sup>, *Yongju He*<sup>a,\*</sup>

<sup>a</sup> School of Materials Science and Engineering, Central South University, Changsha, Hunan 410083, China

<sup>b</sup> Institute of Super-Microstructure and Ultrafast Process in Advanced Materials, School of Physics and Electronics, Central South University, Changsha, Hunan 410083, China

<sup>c</sup> Department of Neurology, The Second Xiangya Hospital, Central South University, Changsha, Hunan 410011, China

<sup>d</sup> Xiangya School of Pharmaceutical Sciences, Central South University, Changsha, Hunan 410013, China

\* Corresponding author: [heyongju@csu.edu.cn](mailto:heyongju@csu.edu.cn) (Yongju He)

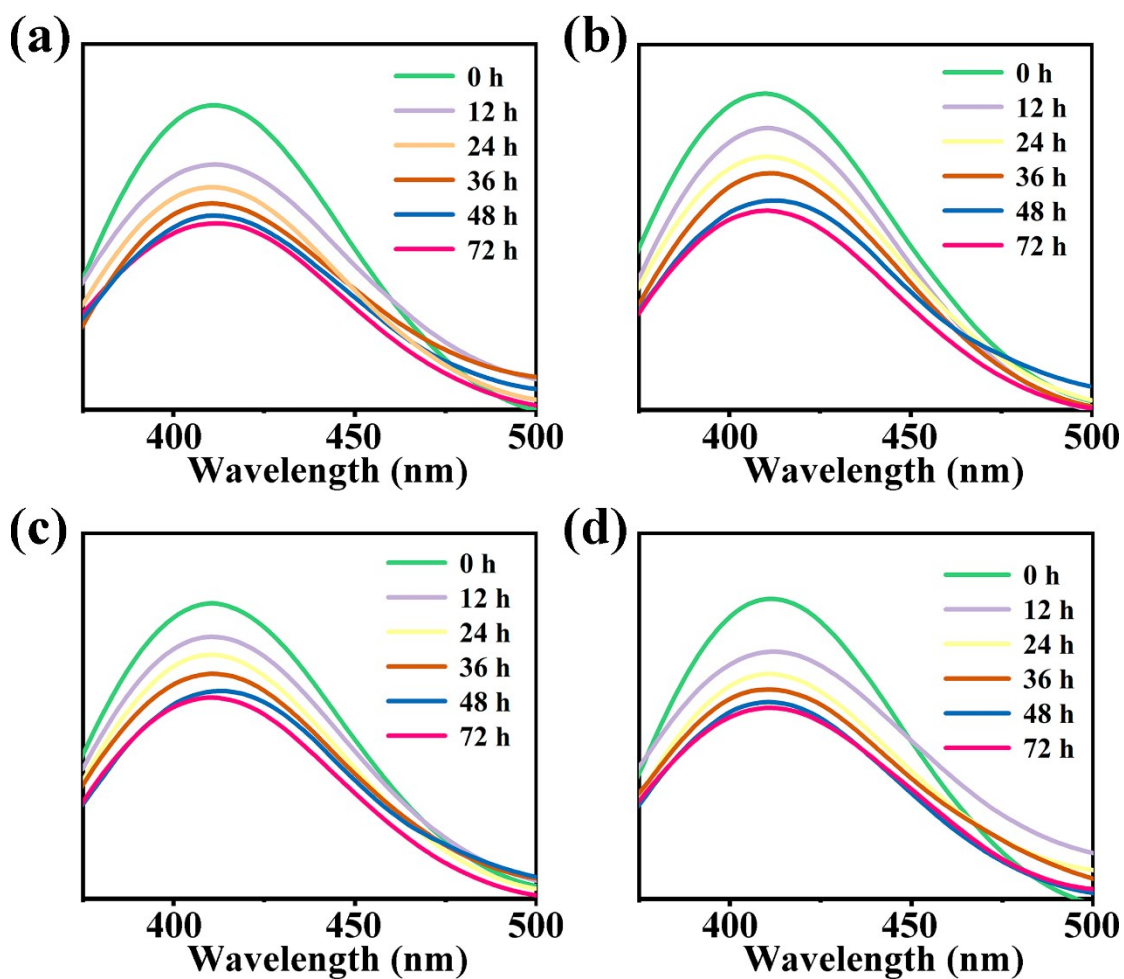

**Fig. S1** UV-vis spectra of DTNB+10 mM GSH solution after treatment with (a) S4MSN (200  $\mu\text{g/mL}$ ), S4MSN@Fe<sup>2+</sup> (at S4MSN dose of 200  $\mu\text{g/mL}$ ), (c) S4MSN@DOX (at S4MSN dose of 200  $\mu\text{g/mL}$ ) and S4MSN@DOX-Fe<sup>2+</sup> (at S4MSN dose of 200  $\mu\text{g/mL}$ ) for different times.

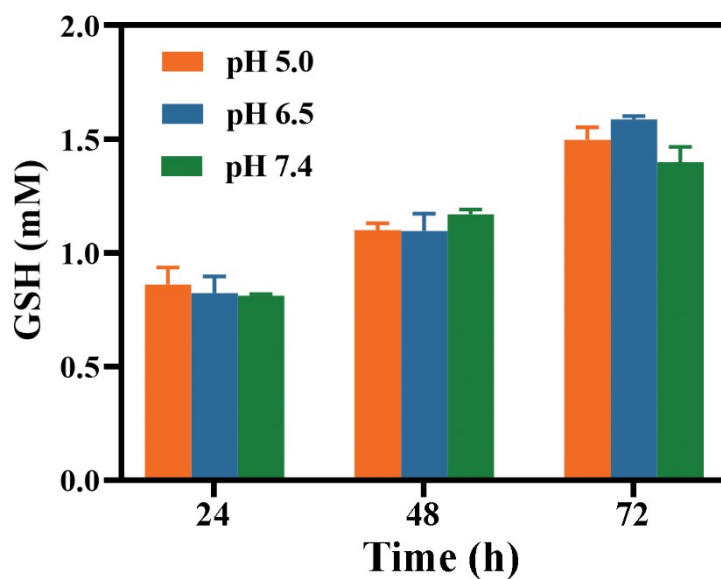

**Fig. S2** The depleting amount of GSH by S4MSN@DOX-Fe<sup>2+</sup> (200  $\mu\text{g/mL}$ ) at pH 7.4, 6.5 and 5.0.

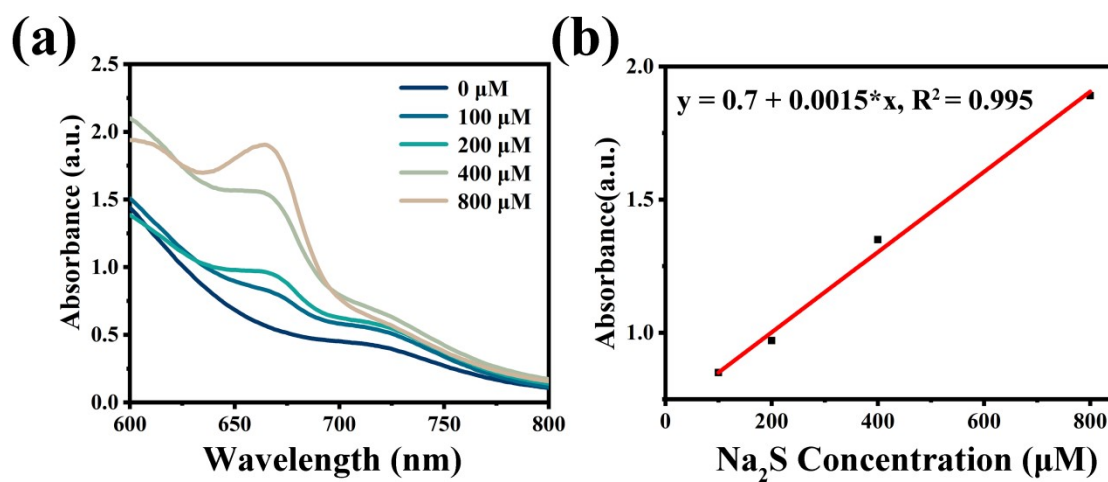

**Fig. S3** (a) UV-vis absorption of DMPD•2HCl solution reacted with different concentrations of Na<sub>2</sub>S. (b) The standard curve of Na<sub>2</sub>S reacted with DMPD•2HCl at 660 nm wavelength.

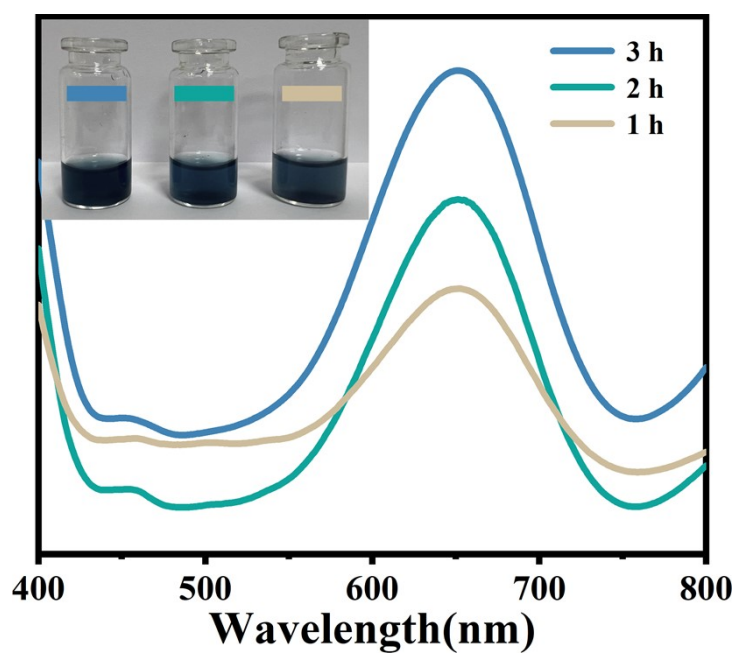

**Fig. S4** UV-vis absorption of TMB treated with 100 μg/ml S4MSN@DOX-Fe<sup>2+</sup> and 0.5 mM H<sub>2</sub>O<sub>2</sub> for 1, 2 and 3 h.

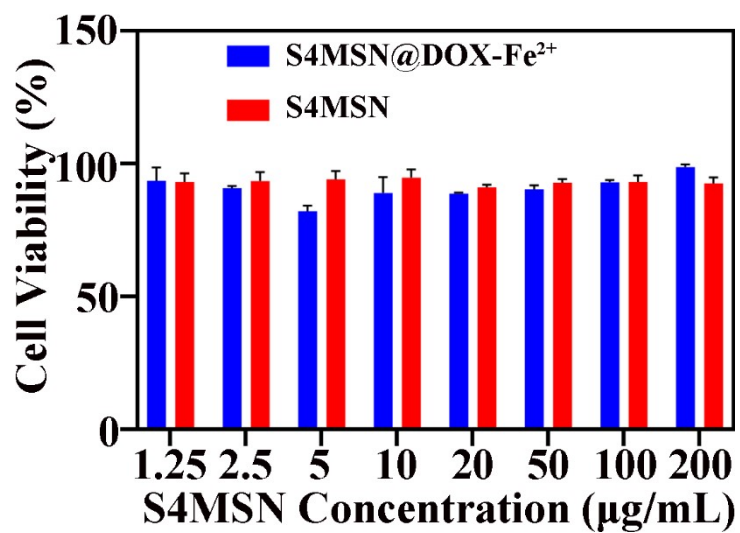

**Fig. S5** Viability of MOVAS cells after 48 h treatment with different formulations.

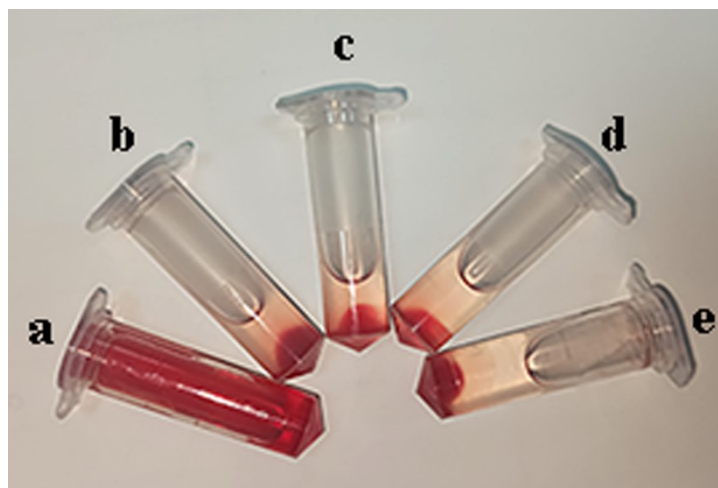

**Fig. S6** Hemolysis assay of S4MSN@DOX-Fe<sup>2+</sup> after incubation with RBC suspension for 24 h. (a, b, c, d, e were deionized water, PBS, PBS containing 100 µg/mL, 200 µg/mL and 300 µg/mL S4MSN@DOX-Fe<sup>2+</sup>, respectively)

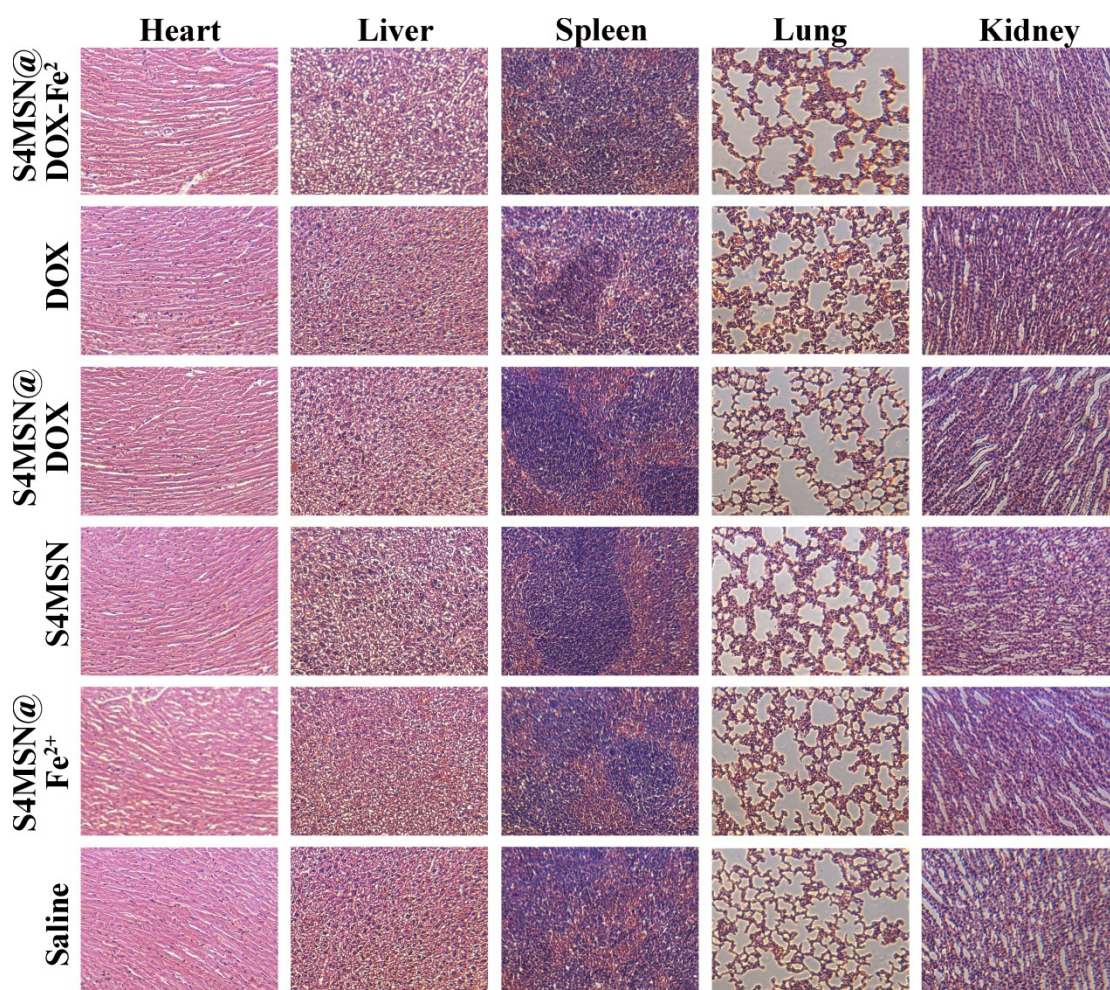

Fig. S7 H&E staining of major organs (heart, liver, spleen, lung and kidney) from different groups after 10 days treatment.

Table S1 Blood routine data of mice intravenous injection with saline and S4MSN@DOX-Fe<sup>2+</sup>.

| Name | Saline     | S4MSN@DOX-Fe <sup>2+</sup> | Unit                |
|------|------------|----------------------------|---------------------|
| WBC  | 8.46±0.81  | 6.8±0.26                   | 10 <sup>9</sup> /L  |
| RBC  | 10.59±0.24 | 9.06±0.08                  | 10 <sup>12</sup> /L |
| HGB  | 148±3.46   | 133±1                      | g/L                 |
| HCT  | 52.53±0.75 | 45.96±0.49                 | %                   |
| MCV  | 49.67±0.35 | 50.77±0.97                 | fL                  |
| RDW  | 14.5±0.45  | 15.06±0.15                 | %                   |
| PLT  | 1230±59    | 919.67±158.37              | 10 <sup>9</sup> /L  |
| MPV  | 6.23±0.25  | 5.13±0.2                   | fL                  |
| PDW  | 16.77±0.15 | 16.37±0.05                 | /                   |
